# Supplementary material for: Synergistic Modulation of Seed Metabolites and Enzymatic Antioxidants Tweaks Moisture Stress Tolerance in Non-Cultivated Traditional Rice Genotypes during Germination
Source: MDPI journal article supplement (doi:10.3390/plants11060775), 2022-03-14
Supplement: s1 [file s1]

**Table S1.** Details of collected rice landraces from different agro-ecological zones.

| Agro-climatic Zone                      | Soil type                                                  | Landraces                                                                                                                                                                                                                                                                                                                                                                                                                                                                                                                                                                                |
|-----------------------------------------|------------------------------------------------------------|------------------------------------------------------------------------------------------------------------------------------------------------------------------------------------------------------------------------------------------------------------------------------------------------------------------------------------------------------------------------------------------------------------------------------------------------------------------------------------------------------------------------------------------------------------------------------------------|
| North Eastern Zone                      | Red Sandy Loam, Clay Loam, Saline coastal Alluvium         | Kar samba, Karudan samba, Karukot, Kadaikannan, Kattanoor, Krishna hemavathi, <i>Sadhabahar</i> , Kalanamak, <i>Kalinga-3</i> , <i>Jai Sree Ram</i> , <i>Uma</i> , Baskadam                                                                                                                                                                                                                                                                                                                                                                                                              |
| North Western Zone                      | Non Calcareous Red, Non Calcareous Brown, Calcareous Black | Maranellu, Kalaheri, Milagi, Mollikarumbu, <i>Vanapraba</i> , <i>Virendra</i> , White sannah, Thuyamalli, China punchai                                                                                                                                                                                                                                                                                                                                                                                                                                                                  |
| Cauvery Delta Zone                      | Red Loamy, Alluvium                                        | Kuruvaikar, Seeraga samba, Kichadi samba, Kallinga, Kuruvaikalanchiyam, Meikuruvai, Surakuruvai, Kullakar, Kichali samba, Kattu samba, Thanga samba, Kothamalli samba, Milagu Samba, Aathur Kichadi Samba, Mapillai samba, Karuvalli, Eravipondi                                                                                                                                                                                                                                                                                                                                         |
| Southern Zone                           | Coastal Alluvium , Black, Red Sandy soil, Deep red soil    | Kavuni, Chandaikar, Kuliyaadichan, Chithiraikar, Nootripathu, Poonkar, Mallikar, <i>Rajalakshmi</i> , Sivappumalli, Thamarai, Sivappukavuni, Norungan, AanaiKomban, Kattuyanam, Navarai, Karuppu Kavuni, <i>Swarna</i>                                                                                                                                                                                                                                                                                                                                                                   |
| High Rainfall Zone                      | Saline Coastal, Alluvium, Deep Red Loam                    | Mattaikar, Adukan, <i>Anjali</i> , <i>Annada</i> , Mulampunchan, Abya, <i>Sahbagidhan</i> , Pokkali, <i>Bharathi</i> , <i>Jaya</i> , Kayumma, Kottara samba, Muttakaruva, Chenellu, Chembavu, Thondi, Aryan, Chenthadi, Kollam samba, Nochin samba, KunjuKurju, <i>Akshayaponni</i> , Chitteni, Chuvanna, Varakkuranellu, Chunjamkarnellu, ThavalaKannum, Vattan, Pattani, Ohenellu, Chakhaepoirecton, Chakhaeamubi , Eluppai poo samba, Chemban, Chumala, Kerala kandhasala, Arikiraavi, Chenkayama, Oheruchitteni, <i>Vandhana</i> , Varaputha, Veethirupa, Naatuponni, Arubathamkodai |
| North Eastern part of India (Meghalaya) | Loamy to fine loamy                                        | MBR (Meghalaya black rice)                                                                                                                                                                                                                                                                                                                                                                                                                                                                                                                                                               |

\*Seed materials are collected from farmers in the respective zones. The checks IR 64 and IR64 DRT obtained from DPB &G, A.C and R.I, Killikulam.

**Table S2.** Proportion of variance, cumulative proportion and eigen values of rice genotypes during seed germination.

| Statistics             | PC1   | PC2   | PC3   | PC4   | PC5   | PC6   | PC7   | PC8   | PC9   | PC10  | PC11   |
|------------------------|-------|-------|-------|-------|-------|-------|-------|-------|-------|-------|--------|
| DS                     |       |       |       |       |       |       |       |       |       |       |        |
| Proportion of Variance | 66.61 | 12.13 | 10.19 | 4.73  | 2.60  | 2.10  | 0.81  | 0.57  | 0.14  | 0.08  | 0.02   |
| Cumulative Proportion  | 66.61 | 78.73 | 88.93 | 93.66 | 96.27 | 98.37 | 99.18 | 99.75 | 99.90 | 99.98 | 100.00 |
| EigenValues            | 8.66  | 1.58  | 1.33  | 0.62  | 0.34  | 0.28  | 0.11  | 0.07  | 0.02  | 0.01  | 0.00   |
| NS                     |       |       |       |       |       |       |       |       |       |       |        |
| Proportion of Variance | 41.87 | 23.93 | 13.06 | 7.74  | 4.98  | 2.79  | 2.39  | 1.70  | 0.96  | 0.47  | 0.06   |
| Cumulative Proportion  | 41.87 | 65.80 | 78.86 | 86.61 | 91.60 | 94.39 | 96.79 | 98.49 | 99.45 | 99.93 | 100.00 |
| EigenValues            | 5.44  | 3.11  | 1.69  | 1.00  | 0.64  | 0.36  | 0.31  | 0.22  | 0.12  | 0.06  | 0.01   |

**Table S3.** Contribution of different drought tolerance contributing attributes towards total variance in rice genotypes.

| Attributes  | Eigen vectors |             |             |             |             |             |             |             |             |             |
|-------------|---------------|-------------|-------------|-------------|-------------|-------------|-------------|-------------|-------------|-------------|
|             | PC1           |             | PC2         |             | PC3         |             | PC4         |             | PC5         |             |
|             | DS            | NS          | DS          | NS          | DS          | NS          | DS          | NS          | DS          | NS          |
| Amylase     | <b>0.94</b>   | <b>0.69</b> | -0.13       | -0.44       | -0.06       | 0.13        | -0.06       | -0.47       | -0.25       | 0.12        |
| Protease    | <b>0.95</b>   | <b>0.85</b> | -0.09       | <b>0.34</b> | 0.02        | -0.21       | -0.04       | 0.05        | 0.13        | 0.21        |
| Lipase      | <b>0.96</b>   | <b>0.96</b> | 0.03        | -0.02       | 0.17        | -0.04       | 0.07        | -0.01       | 0.03        | 0.13        |
| Amino acids | -0.11         | 0.06        | <b>0.91</b> | <b>0.46</b> | -0.08       | -0.69       | <b>0.33</b> | <b>0.45</b> | -0.06       | 0.04        |
| Starch      | -0.87         | -0.37       | 0.09        | <b>0.31</b> | 0.24        | <b>0.75</b> | 0.30        | 0.05        | 0.06        | -0.09       |
| Protein     | -0.88         | -0.35       | 0.12        | -0.72       | -0.35       | -0.02       | 0.07        | 0.26        | 0.24        | 0.31        |
| TSS         | <b>0.96</b>   | <b>0.93</b> | 0.18        | -0.18       | 0.12        | 0.06        | 0.09        | -0.19       | -0.03       | 0.08        |
| GA          | <b>0.96</b>   | <b>0.96</b> | -0.03       | -0.04       | 0.10        | -0.07       | 0.14        | 0.06        | 0.08        | -0.13       |
| IAA         | <b>0.56</b>   | 0.16        | -0.40       | -0.84       | -0.52       | 0.03        | <b>0.42</b> | 0.12        | 0.08        | -0.43       |
| CAT         | <b>0.78</b>   | <b>0.44</b> | 0.32        | <b>0.72</b> | 0.18        | 0.23        | -0.24       | 0.13        | <b>0.38</b> | -0.31       |
| SOD         | -0.61         | -0.17       | 0.02        | <b>0.82</b> | <b>0.72</b> | 0.04        | 0.04        | -0.38       | -0.04       | 0.11        |
| Proline     | <b>0.83</b>   | <b>0.92</b> | -0.11       | 0.03        | <b>0.39</b> | 0.14        | 0.31        | 0.21        | -0.00       | -0.16       |
| RWC         | <b>0.68</b>   | <b>0.33</b> | <b>0.60</b> | 0.03        | -0.29       | <b>0.69</b> | -0.15       | <b>0.47</b> | -0.14       | <b>0.33</b> |

**Table S4.** Correlation coefficients among various attributes under controlled environment (C) during seed germination in selected rice genotypes.

|          | GR      | Amylase | Protease | Lipase  | AA     | Starch | Protein | TSS     | GA      | IAA      | CAT   | SOD    | Proline |
|----------|---------|---------|----------|---------|--------|--------|---------|---------|---------|----------|-------|--------|---------|
| Amylase  | 0.399   |         |          |         |        |        |         |         |         |          |       |        |         |
| Protease | 0.767** | 0.379   |          |         |        |        |         |         |         |          |       |        |         |
| Lipase   | 0.693** | 0.709** | 0.843**  |         |        |        |         |         |         |          |       |        |         |
| AA       | 0.226   | -0.419  | 0.351    | 0.123   |        |        |         |         |         |          |       |        |         |
| Starch   | -0.607  | -0.312  | -0.377   | -0.365  | -0.311 |        |         |         |         |          |       |        |         |
| Protein  | -0.517  | 0.007   | -0.500   | -0.279  | -0.210 | -0.129 |         |         |         |          |       |        |         |
| TSS      | 0.635*  | 0.827** | 0.735**  | 0.908** | -0.155 | -0.365 | -0.228  |         |         |          |       |        |         |
| GA       | 0.632*  | 0.654*  | 0.798**  | 0.878** | 0.107  | -0.425 | -0.336  | 0.875** |         |          |       |        |         |
| IAA      | -0.115  | 0.376   | -0.266   | 0.147   | -0.350 | -0.284 | 0.451   | 0.247   | 0.228   |          |       |        |         |
| CAT      | 0.414   | -0.079  | 0.498*   | 0.310   | 0.215  | 0.201  | -0.638* | 0.244   | 0.456   | -0.387   |       |        |         |
| SOD      | 0.266   | -0.262  | 0.067    | -0.146  | 0.190  | 0.274  | -0.525  | -0.239  | -0.282  | -0.759** | 0.485 |        |         |
| Proline  | 0.584*  | 0.534*  | 0.744**  | 0.898** | 0.076  | -0.176 | -0.317  | 0.791** | 0.888** | 0.237    | 0.550 | -0.181 |         |
| RWC      | -0.097  | 0.118   | 0.224    | 0.301   | -0.230 | 0.323  | 0.008   | 0.281   | 0.255   | -0.008   | 0.293 | -0.118 | 0.429   |

**Table S5.** Correlation coefficients among various attributes under induced moisture stress during seed germination in selected rice genotypes.

|          | GR       | Amylase  | Protease | Lipase   | AA     | Starch   | Protein  | TSS     | GA      | IAA     | CAT    | SOD     | Proline |
|----------|----------|----------|----------|----------|--------|----------|----------|---------|---------|---------|--------|---------|---------|
| Amylase  | 0.627*   |          |          |          |        |          |          |         |         |         |        |         |         |
| Protease | 0.531*   | 0.855**  |          |          |        |          |          |         |         |         |        |         |         |
| Lipase   | 0.512*   | 0.878**  | 0.914**  |          |        |          |          |         |         |         |        |         |         |
| AA       | 0.178    | -0.218   | -0.225   | -0.082   |        |          |          |         |         |         |        |         |         |
| Starch   | -0.796** | -0.908** | -0.844** | -0.764** | 0.227  |          |          |         |         |         |        |         |         |
| Protein  | 0.565*   | 0.877**  | 0.895**  | 0.973**  | 0.074  | -0.755** | -0.876** |         |         |         |        |         |         |
| TSS      | 0.489    | 0.870**  | 0.927**  | 0.971**  | -0.095 | -0.786** | -0.853** | 0.932** |         |         |        |         |         |
| GA       | 0.431    | 0.594*   | 0.555*   | 0.457    | -0.230 | -0.569*  | -0.328   | 0.444   | 0.552   |         |        |         |         |
| IAA      | 0.620*   | 0.625*   | 0.771**  | 0.793**  | 0.103  | -0.683** | -0.657*  | 0.813** | 0.753** | 0.178   |        |         |         |
| CAT      | -0.712** | -0.599   | -0.570*  | -0.499*  | 0.085  | 0.670**  | 0.279    | -0.499* | -0.532  | -0.653* | -0.345 |         |         |
| SOD      | 0.136    | 0.740**  | 0.816**  | 0.909**  | -0.147 | -0.516*  | -0.871** | 0.872** | 0.892** | 0.413   | 0.603* | -0.267  |         |
| Proline  | 0.790**  | 0.602*   | 0.607*   | 0.617*   | 0.436  | -0.637*  | -0.468   | 0.731** | 0.558   | 0.212   | 0.645* | -0.638* | 0.362   |
| RWC      | 0.565*   | 0.877**  | 0.895**  | 0.973**  | 0.074  | -0.755** | -0.876** |         |         |         |        |         |         |

**Table S6.** Comparison of Cytokinin and ABA content during seed germination.

| Genotypes    | Cytokinin (ug.g <sup>-1</sup> ) |         | Per cent<br>reduction over<br>control | ABA (ug.g <sup>-1</sup> ) |         | Per cent<br>Increase over control |
|--------------|---------------------------------|---------|---------------------------------------|---------------------------|---------|-----------------------------------|
|              | -1.5 MPa                        | Control |                                       | -1.5<br>MPa               | Control |                                   |
| Kuliyadichan | 0.37                            | 0.43    | 13 <sup>g</sup>                       | 0.18                      | 0.11    | 38.4 <sup>a</sup>                 |
| Rajalakshmi  | 0.27                            | 0.37    | 29 <sup>b</sup>                       | 0.12                      | 0.09    | 33.3 <sup>c</sup>                 |
| Sahbhagidhan | 0.31                            | 0.39    | 21 <sup>d</sup>                       | 0.14                      | 0.08    | 27.3 <sup>e</sup>                 |
| Chandaikar   | 0.28                            | 0.35    | 19 <sup>e</sup>                       | 0.13                      | 0.09    | 30.0 <sup>d</sup>                 |
| Mallikar     | 0.23                            | 0.31    | 25 <sup>c</sup>                       | 0.11                      | 0.07    | 37.5 <sup>b</sup>                 |
| IR64 Drt1    | 0.33                            | 0.40    | 18 <sup>f</sup>                       | 0.12                      | 0.08    | 33.3 <sup>c</sup>                 |
| IR 64        | 0.09                            | 0.24    | 63 <sup>a</sup>                       | 0.07                      | 0.05    | 16.7 <sup>f</sup>                 |

Values are mean values of three replications followed by the same letter in each column are not significantly different from each other as determined by DMRT ( $p < 0.05$ ).

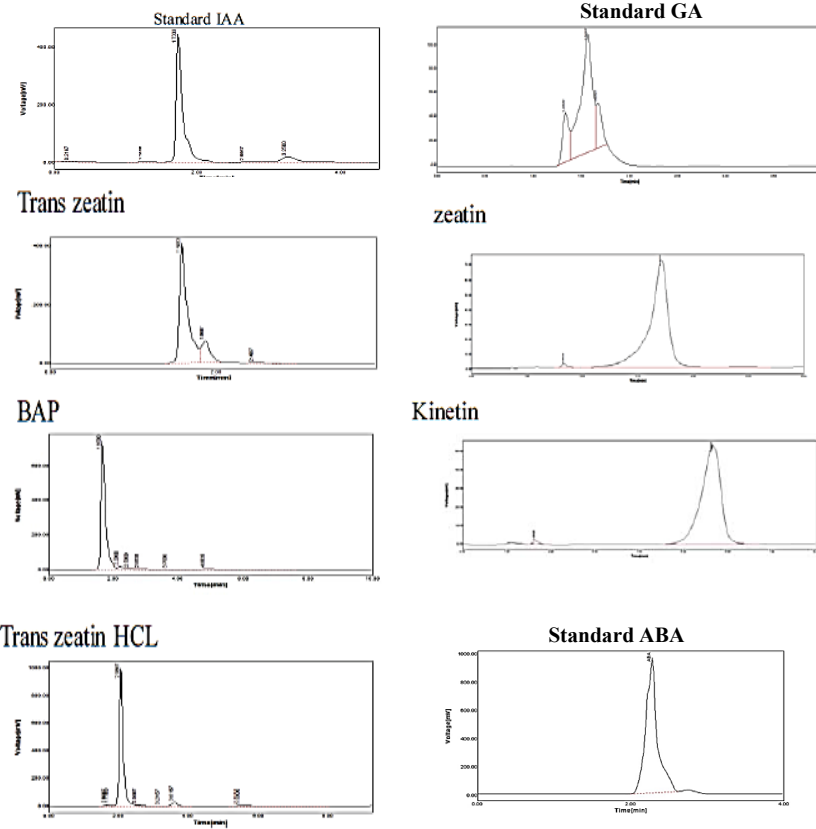

**Figure S1.** HPLC chromatogram for standard phytohormones IAA, GA, Cytokinin and ABA at 100 ppm.

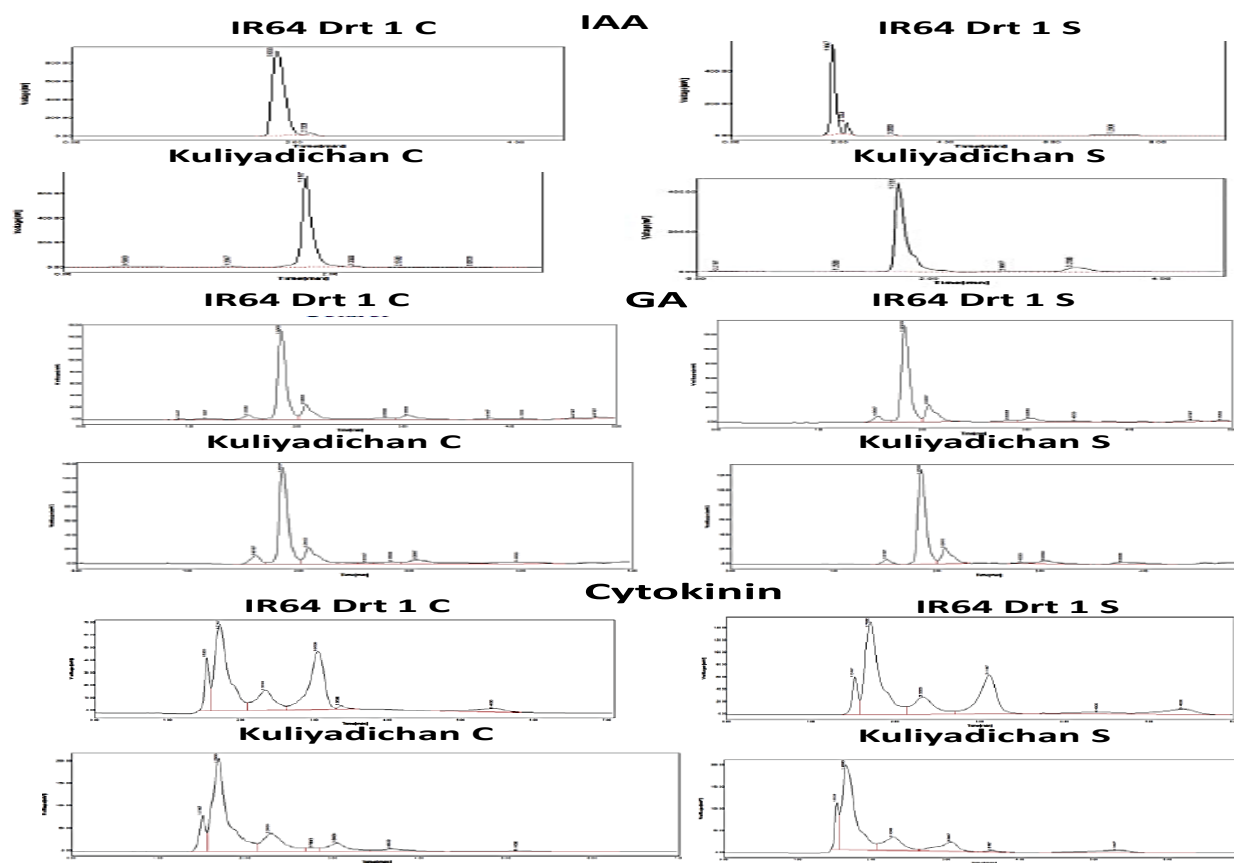

**Figure S2.** HPLC chromatograms depicting phytohormones for the promising genotype Kuliadichan in comparison with IR64 (Drt1). (HPLC chromatograms depicting phytohormones for the promising genotype Kuliadichan in comparison with IR64(Drt1). The standard chromatograms are given in supplementary material S7. .a) S- induced moisture stress of -1.5MPa. b) C- controlled environment.
